# Supplementary material for: Photofluorochromic organic supramolecular compounds for multiple dynamic anticounterfeiting
Source: Royal Society of Chemistry journal article supplement (doi:10.1039/d4qi02089h), 2024-01-01
Supplement: d4qi02089h1.pdf [file d4qi02089h1.pdf]

## Electronic Supplementary Information

### Photofluorochromic Organic Supramolecular Compounds for Multiple Dynamic Anticounterfeiting

Yang Hua, Li Huang, Yuan Shen, Kun Huang, Wen-Bo Cui, Zi-Yi Li and Hong Zhang\*

Institute of Polyoxometalate Chemistry, Department of Chemistry, Northeast Normal University, Changchun, Jilin 130024, P. R. China.

E-mail: hope20130122@163.com, zhangh@nenu.edu.cn

#### Table of contents

**Fig. S1** Structure of compound **1** (a) Two-dimensional layer. (b) Types of ligands. (c) Three-dimensional supramolecule.

**Fig. S2** Structure of compound **2** (a)  $\pi$ - $\pi$  stacking interactions between viologen cations. (b) Three-dimensional supramolecule. (c) Hydrogen-bonded two-dimensional layer.

**Fig. S3** Structure of compound **3** (a) Hydrogen-bond two-dimensional layer and  $\pi$  $\cdots$  $\pi$  stacking interactions. (b) Hydrogen-bonded two-dimensional layer. (c) Three-dimensional supramolecule.

**Fig. S4** FT-IR spectra of compounds **1** (a) and **3**(b). Labels: **1a** and **3a**; **bmpyd**·HCl and **bpyen**·HCl; **bmpyd** and **bpyen**.

**Fig. S5** FT-IR spectra of compounds **1** (a) and **2** (b). Labels: **1a** and **2a**: before irradiation; **1b-P** and **2b-P**: after photo irradiation.

**Fig. S6** PXRD patterns of compounds **1** (a) and **2** (b). Labels: **1a** and **2a**: before irradiation; **1b-P** and **2b-P**: after photo irradiation; **p-decolored (1)**: heating in 120 °C for 0.5 h, and **decolored (2)**: placing in the dark for 7 days, respectively; **simulated**: simulated patterns from single-crystal X-ray structure data.

**Fig. S7** PXRD patterns of compound **3**. Labels: **3a**: before irradiation; **3b-P**: after photo irradiation.

**Fig. S8** TGA curve of compound **1** (a), compound **2** (b) was investigated using powder samples under N<sub>2</sub>. The corresponding weight loss values are 4.2% and 6.9% (calc. 5.0% and 7.4 %) corresponding to the loss of three free H<sub>2</sub>O molecules.

**Fig. S9** TGA curve of compound **3** was investigated using powder samples under N<sub>2</sub>.

**Fig. S10** (a) UV-vis spectra of compound **3**, (b) before and after Xe lamp irradiation. EPR spectra of compound **3**.

**Fig. S11** FT-IR spectra of compound **3**. Labels: **3a**: before irradiation; **3b-P**: after photo irradiation.

**Fig. S12** (a) Cyclability of compound **1**, (b) cyclability of compound **2**.

**Fig. S13** (a) PL emission and excitation spectra of the compound **1**, (b) PL emission and excitation spectra of the compound **2**.

**Fig. S14** (a) Steady-state emission spectra of compound **1** after irradiation, (b) CIE coordinates of compound **1** before and after irradiation at room temperature.

**Fig. S15** (a) Steady-state emission spectra of compound **2** after irradiation, (b) CIE coordinates of compound **2** before and after irradiation at room temperature.

**Fig. S16** Photographs of compound **3**, bpyen, pbpy and bmpyd before and after UV irradiation (365 nm) at room temperature.

**Fig. S17 (a)** Luminescence spectrum of compound **1** in the initial state and UV-vis diffuse reflectance spectrum of compound **1** in the colored state, **(b)** Luminescence spectrum of compound **2** in the initial state and UV-vis diffuse reflectance spectrum of compound **2** in the colored state.

## 1. Experimental section

### Materials and characterization methods

All reagents were purchased commercially and used without further purification. The ligands Bmypo, Pbp and Bpyen were synthesized as reported. The IR spectra were measured by a Mattson Alpha-Centauri spectrometer. Powder X-ray diffraction (PXRD) patterns were collected on Rigaku Dmax 2000 X-ray diffractometer using Cu K $\alpha$  radiation ( $\lambda = 0.15418 \text{ \AA}$ ) at room temperature in the  $2\theta$  range of 5–50°. UV–Vis absorption spectra were measured on a Cary7000 UV-Vis-NIR spectrophotometer. ESR spectra were recorded at X-band frequency (9.867 GHz) on a Bruker ELEXSYS E500 spectrometer. TG analysis was performed on a Perkin-Elmer model TG-7 analyzer from room temperature to 800 °C under nitrogen. A PLSSXE300C 300 W xenon lamp (ca. 2.4 W/cm<sup>2</sup>) was used to illuminate samples for achieving various spectra. Fluorescence spectra were obtained with a FLSP920 fluorescence spectrometer equipped with a 450 W Xe lamp and a R928P PMT detector. A UV light (15 W) was used for photofluorescent color change. Elemental analyses were performed on a PerkinElmer 2400 CHN elemental analyzer.

### Preparation of anti-counterfeiting images

First, we prepared the "38", "77", "NENU", "sad face" and QR code anti-counterfeiting image model. Different samples are filled up the "38", "77", and "NENU" models for further photo-treat. For hybrid two-dimensional code, compound 1 is filled into the QR code model, sealed with a transparent film, and then a transparent film compound 2 is covered to the first layer of the film. The depth of the model and the film is 0.2mm.

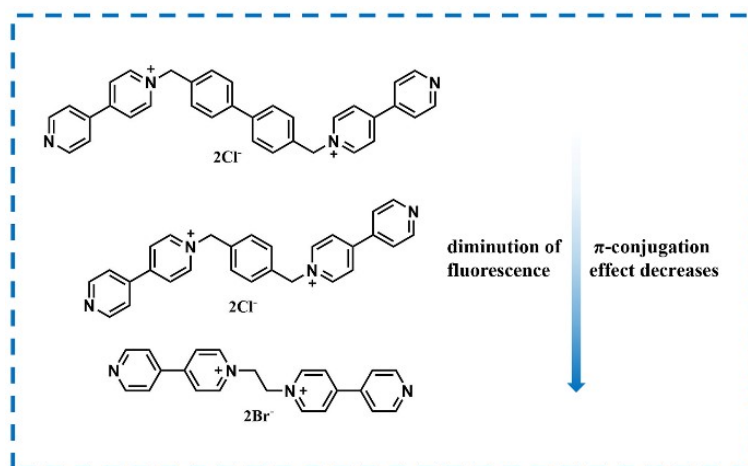

**Scheme 1.** The molecular structure of (Bmypo)Cl<sub>2</sub>, (Pbp)Cl<sub>2</sub>, (Bpyen)Br<sub>2</sub>.

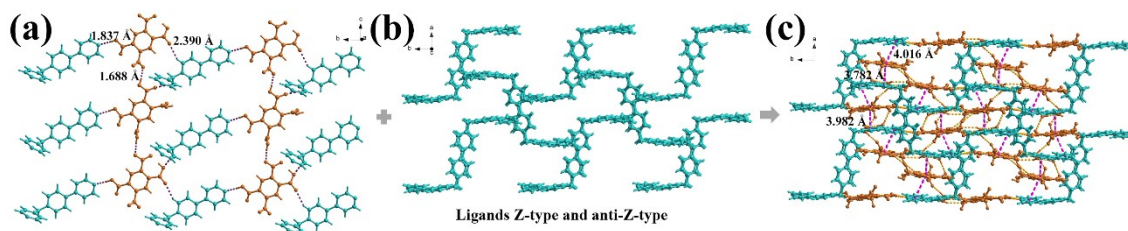

**Fig. S1** Structure of compound **1** (a) Two-dimensional layer. (b) Types of ligands. (c) Three-dimensional supramolecule.

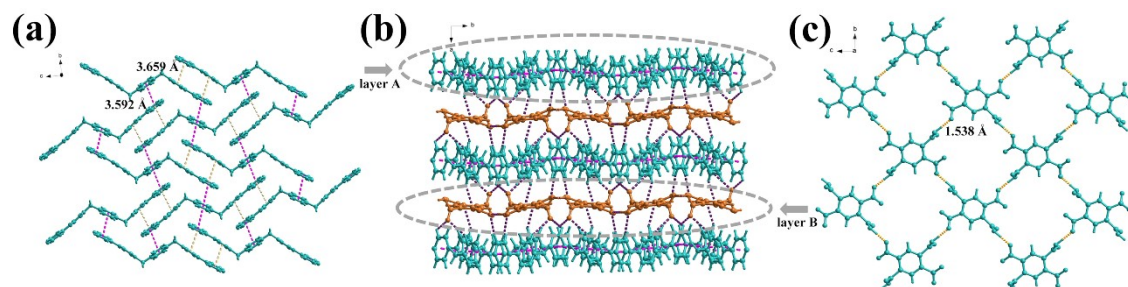

**Fig. S2** Structure of compound **2** (a)  $\pi$ - $\pi$  stacking interactions between viologen cations. (b) Three-dimensional supramolecule. (c) Hydrogen-bonded two-dimensional layer.

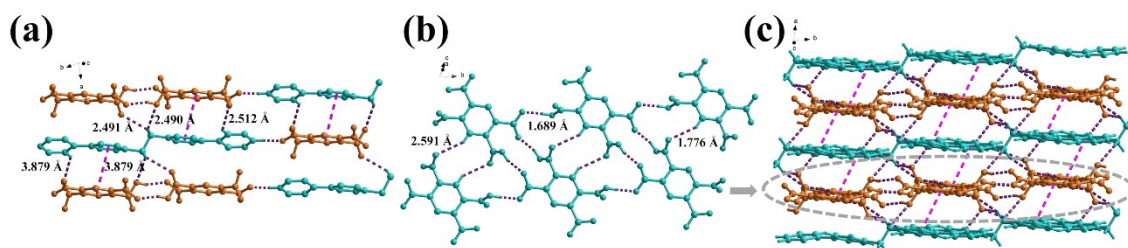

**Fig. S3** Structure of compound **3** (a) Hydrogen-bond two-dimensional layer and  $\pi \cdots \pi$  stacking interactions. (b) Hydrogen-bonded two-dimensional layer. (c) Three-dimensional supramolecule.

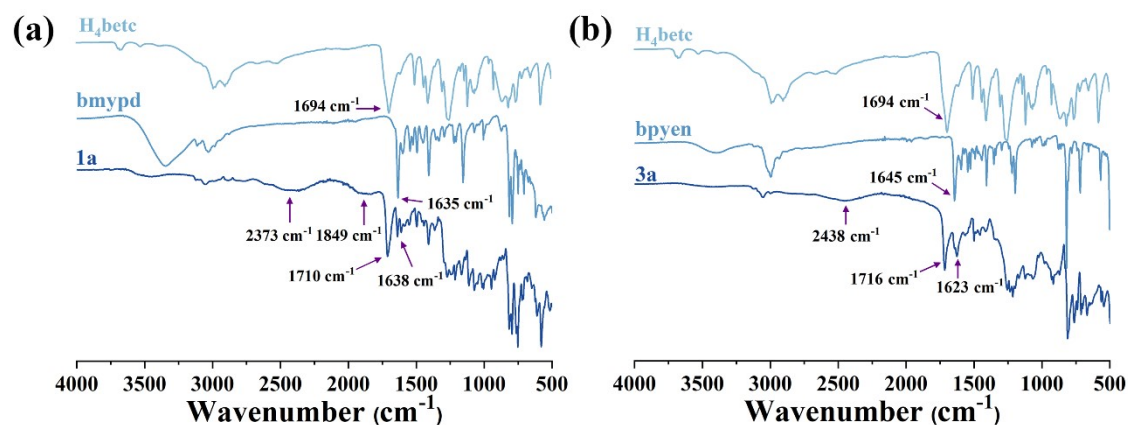

**Fig. S4** FT-IR spectra of compounds **1** (a) and **3**(b). Labels: **1a** and **3a**; bmypd·HCl and bpyen·HCl; bmypd and bpyen.

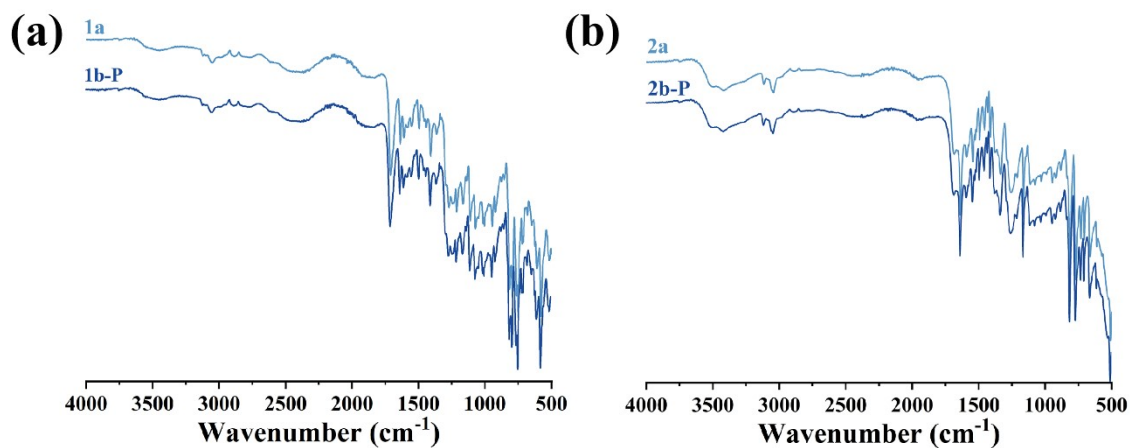

**Fig. S5** FT-IR spectra of compounds 1 (a) and 2 (b). Labels: **1a** and **2a**: before irradiation; **1b-P** and **2b-P**: after photo irradiation.

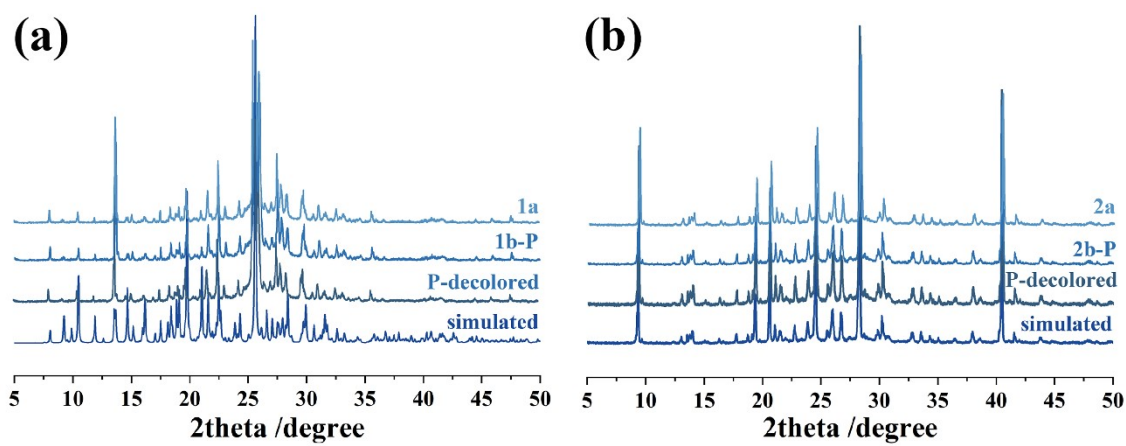

**Fig. S6** PXRD patterns of compounds 1 (a) and 2 (b). Labels: **1a** and **2a**: before irradiation; **1b-P** and **2b-P**: after photo irradiation; **p-decolored (1)**: heating in 120 °C for 0.5 h, and **decolored (2)**: placing in the dark for 7 days, respectively; **simulated**: simulated patterns from single-crystal X-ray structure data.

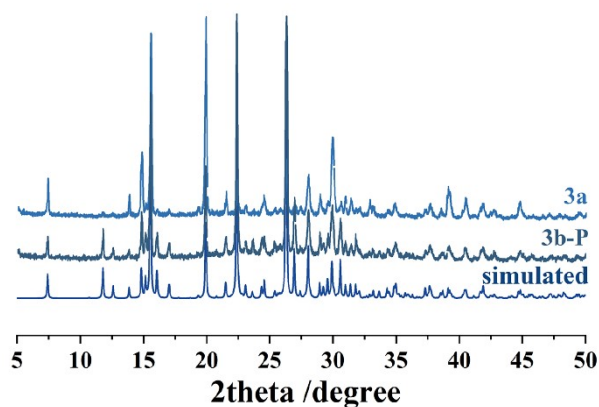

**Fig. S7** PXRD patterns of compound 3. Labels: **3a**: before irradiation; **3b-P**: after photo irradiation.

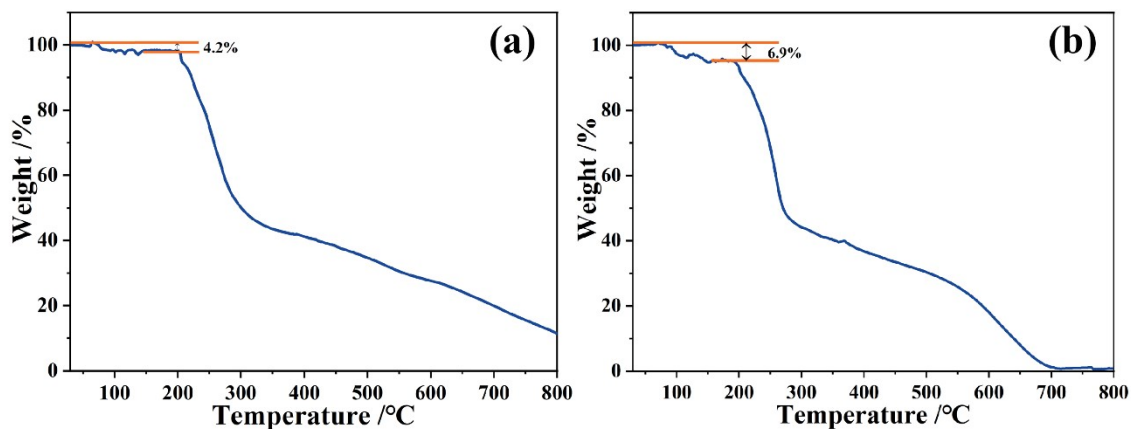

**Fig. S8** TGA curve of compound 1 (a), compound 2 (b) was investigated using powder samples under N<sub>2</sub>. The corresponding weight loss values are 4.2% and 6.9% (calc. 5.0% and 7.4 %) corresponding to the loss of three free H<sub>2</sub>O molecules.

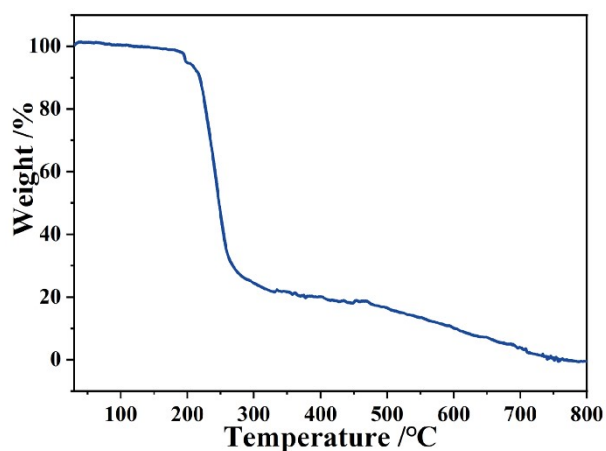

**Fig. S9** TGA curve of compound 3 was investigated using powder samples under N<sub>2</sub>.

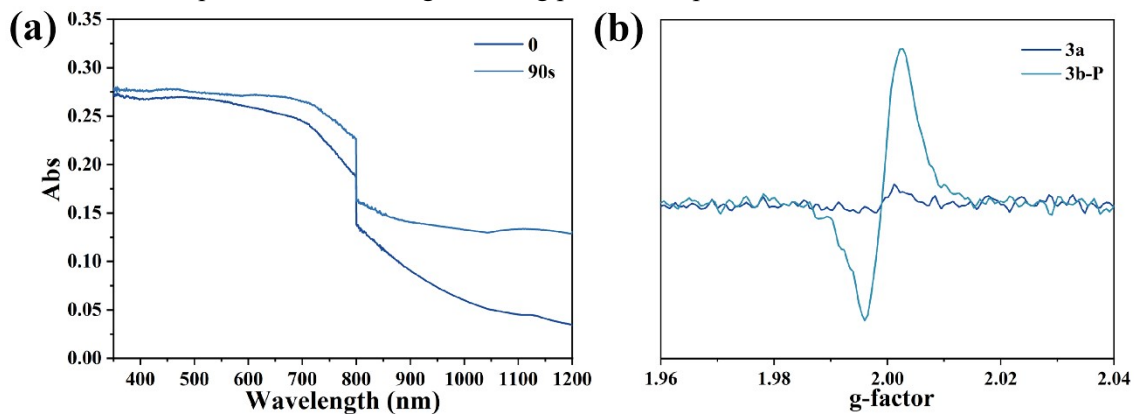

**Fig. S10** (a) UV-vis spectra of compound 3, (b) before and after Xe lamp irradiation. EPR spectra of compound 3.

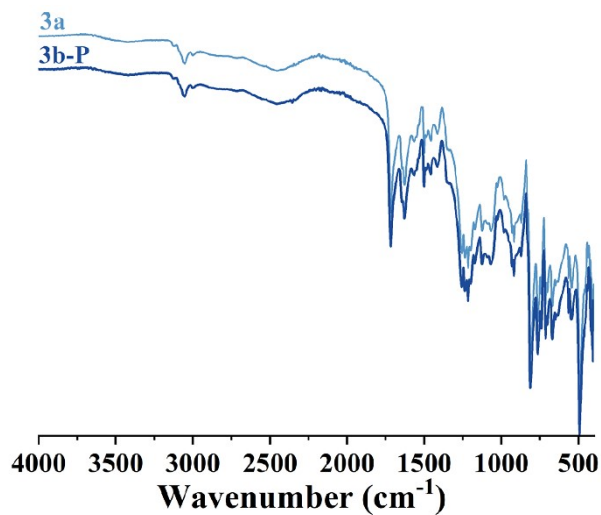

**Fig. S11** FT-IR spectra of compound **3**. Labels: **3a**: before irradiation; **3b-P**: after photo irradiation.

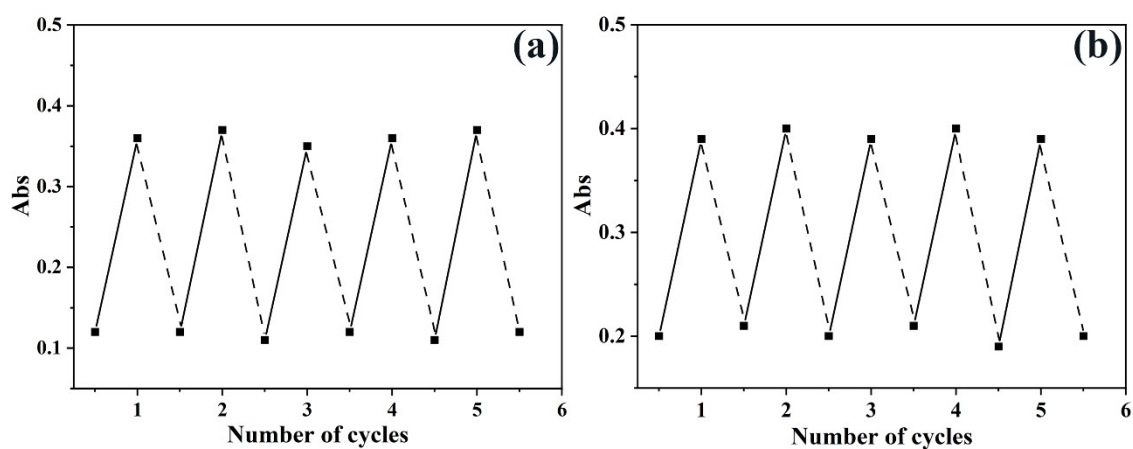

**Fig. S12** (a) Cyclability of compound **1**, (b) cyclability of compound **2**.

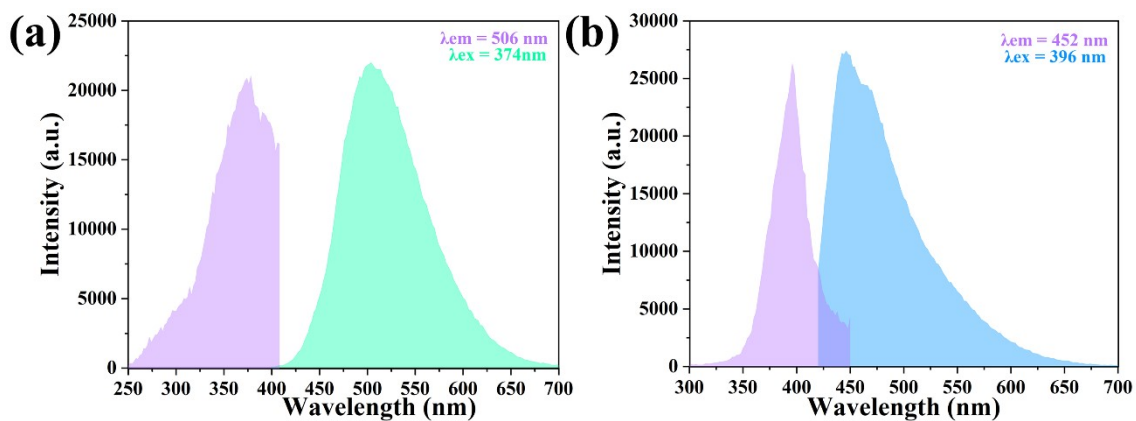

**Fig. S13** (a) PL emission and excitation spectra of the compound **1**, (b) PL emission and excitation spectra of the compound **2**.

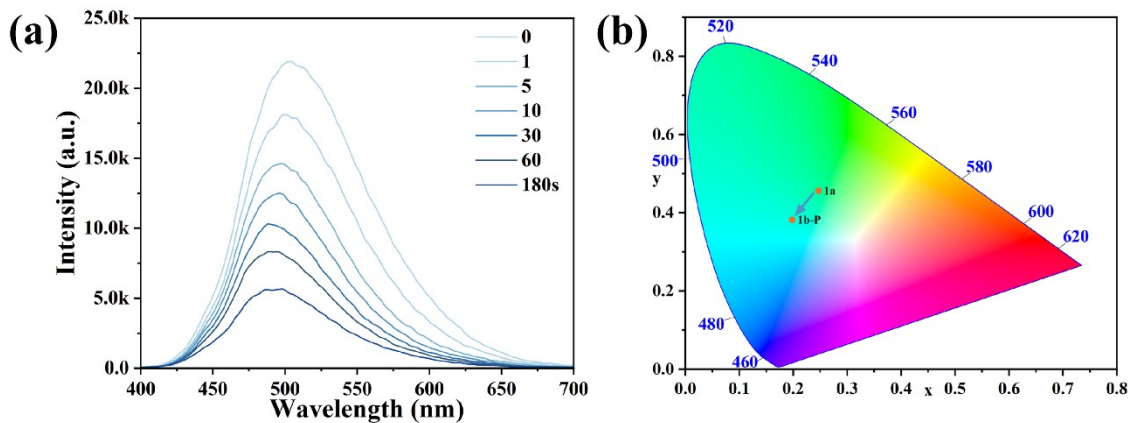

**Fig. S14** (a) Steady-state emission spectra of compound **1** after irradiation, (b) CIE coordinates of compound **1** before and after irradiation at room temperature.

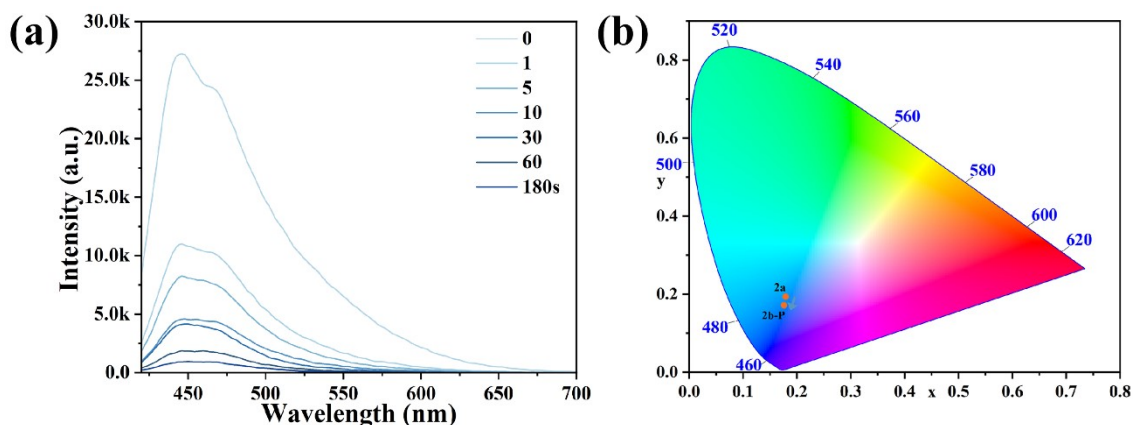

**Fig. S15** (a) Steady-state emission spectra of compound **2** after irradiation, (b) CIE coordinates of compound **2** before and after irradiation at room temperature.

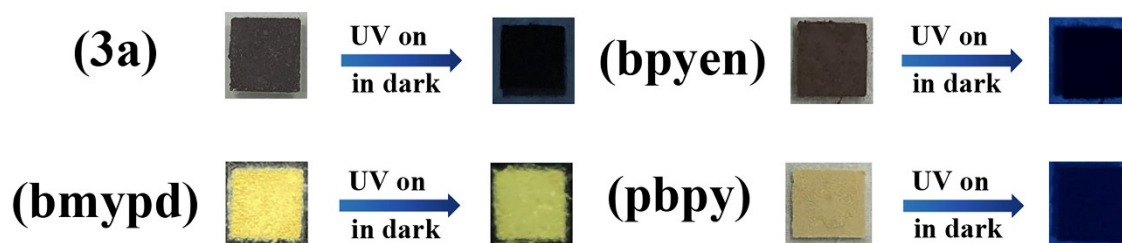

**Fig. S16** Photographs of compound **3**, bpyen, pbpy and bmypd before and after UV irradiation (365 nm) at room temperature.



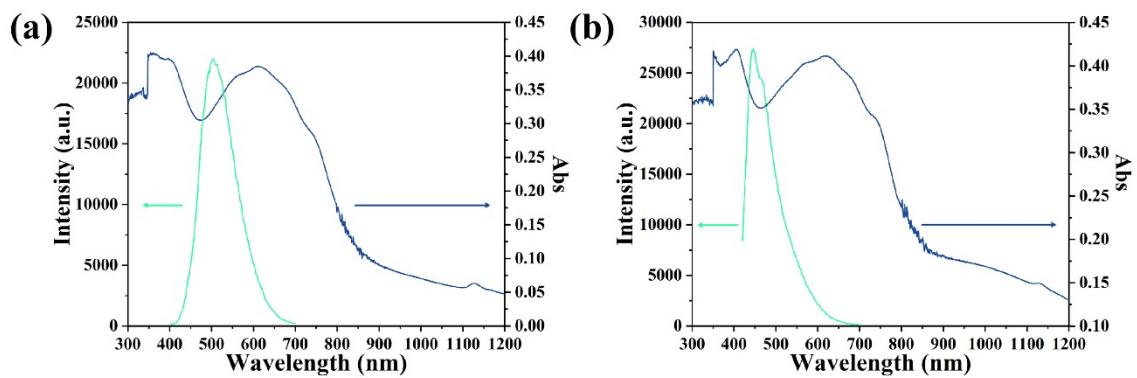

**Fig. S17** (a) Luminescence spectrum of compound **1** in the initial state and UV-vis diffuse reflectance spectrum of compound **1** in the colored state, (b) Luminescence spectrum of compound **2** in the initial state and UV-vis diffuse reflectance spectrum of compound **2** in the colored state.

## Tables.

**Table S1.** Crystal Data and Structure Refinements for **1**, **2**, **3**

| Empirical formula                                     | C <sub>54</sub> H <sub>46</sub> N <sub>4</sub> O <sub>19</sub> ( <b>1</b> ) | C <sub>38</sub> H <sub>36</sub> N <sub>4</sub> O <sub>11</sub> ( <b>2</b> ) | C <sub>42</sub> H <sub>32</sub> N <sub>4</sub> O <sub>16</sub> ( <b>3</b> ) |
|-------------------------------------------------------|-----------------------------------------------------------------------------|-----------------------------------------------------------------------------|-----------------------------------------------------------------------------|
| Formula                                               | 1052.93                                                                     | 722.69                                                                      | 846.70                                                                      |
| T (K)                                                 | 295                                                                         | 295                                                                         | 284                                                                         |
| Crystal system                                        | monoclinic                                                                  | Monoclinic                                                                  | Triclinic                                                                   |
| Space group                                           | <i>P2<sub>1</sub>/n</i>                                                     | <i>P2<sub>1</sub>/n</i>                                                     | <i>P</i> $\bar{1}$                                                          |
| a (Å)                                                 | 13.9394(15)                                                                 | 9.191(3)                                                                    | 8.0044(2)                                                                   |
| b (Å)                                                 | 17.884(2)                                                                   | 12.609(4)                                                                   | 9.6508(2)                                                                   |
| c (Å)                                                 | 19.2029(17)                                                                 | 14.370(4)                                                                   | 12.8662(3)                                                                  |
| $\alpha$ (°)                                          | 90                                                                          | 90                                                                          | 71.243(1)                                                                   |
| $\beta$ (°)                                           | 94.343(3)                                                                   | 94.56(2)                                                                    | 73.948(1)                                                                   |
| $\gamma$ (°)                                          | 90                                                                          | 90                                                                          | 73.077(1)                                                                   |
| V(Å <sup>3</sup> )                                    | 4773.4(9)                                                                   | 1660.1(9)                                                                   | 881.82(4)                                                                   |
| Z                                                     | 4                                                                           | 2                                                                           | 1                                                                           |
| D <sub>x</sub> /Mg m <sup>-3</sup>                    | 1.465                                                                       | 1.450                                                                       | 1.598                                                                       |
| F(000)                                                | 2192                                                                        | 756                                                                         | 438                                                                         |
| U(mm <sup>-1</sup> )                                  | 0.113                                                                       | 0.900                                                                       | 1.060                                                                       |
| GOF                                                   | 1.017                                                                       | 1.008                                                                       | 1.038                                                                       |
| R <sub>1</sub> [ <i>I</i> > 2 $\sigma$ ( <i>I</i> )]  | 0.0747                                                                      | 0.0602                                                                      | 0.0429                                                                      |
| wR <sub>2</sub> [ <i>I</i> > 2 $\sigma$ ( <i>I</i> )] | 0.2126                                                                      | 0.1706                                                                      | 0.1235                                                                      |
| CCDC                                                  | 2304097                                                                     | 2372803                                                                     | 2372809                                                                     |

**Table S2.** Selected bond lengths (Å) and angles (deg) for **1**.

| bond lengths (Å) |          | angles (deg)     |          |
|------------------|----------|------------------|----------|
| C(1)-C(2)        | 1.384(6) | C(1)-N(1)-C(5)   | 117.5(4) |
| C(2)-C(3)        | 1.375(6) | C(2)-C(3)-C(4)   | 116.4(4) |
| C(3)-C(4)        | 1.338(6) | C(3)-C(2)-C(1)   | 119.5(4) |
| C(4)-C(5)        | 1.373(6) | C(4)-C(3)-C(6)   | 121.0(4) |
| N(1)- C(1)       | 1.312(6) | N(1)-C(1)-C(2)   | 123.6(4) |
| N(2)- C(11)      | 1.476(5) | N(2)-C(9)-C(10)  | 120.6(4) |
| N(3)- C(24)      | 1.481(5) | O(1)-C(44)-C(36) | 114.4(3) |
| O(1)-C(44)       | 1.297(5) | O(1)-C(44)-C(36) | 121.4(4) |

|            |          |                  |          |
|------------|----------|------------------|----------|
| O(2)-C(44) | 1.200(5) | O(3)-C(43)-C(37) | 120.7(4) |
| O(3)-C(43) | 1.215(6) | O(3)-C(43)-O(4)  | 126.9(4) |

**Table S3.** Selected bond lengths (Å) and angles (deg) for **2**.

| bond lengths (Å)        |          | angles (deg)     |          |
|-------------------------|----------|------------------|----------|
| C(1)-C(4) <sup>1</sup>  | 1.390(3) | C(1)1-C(4)-C(6)  | 122.1(2) |
| C(2)-C(12) <sup>2</sup> | 1.377(5) | C(2)2-C(12)-C(7) | 120.9(3) |
| C(3)-C(15)              | 1.363(5) | C(3)-C(14)-C(16) | 122.2(3) |
| C(6)-C(8)               | 1.517(4) | C(4)-C(6)-C(8)   | 119.5(2) |
| N(1)-C(5)               | 1.332(4) | N(1)-C(5)-C(19)  | 121.1(3) |
| N(2)-C(9)               | 1.330(5) | N(1)-C(7)-C(12)  | 111.3(3) |
| O(1)-C(10)              | 1.292(3) | N(2)-C(17)-C(11) | 124.0(4) |
| O(1)-C(10)              | 1.292(3) | O(1)-C(10)-C(1)  | 113.7(2) |
| O(3)-C(8)               | 1.222(4) | O(3)-C(8)-O(4)   | 125.1(3) |
| O(4)-C(8)               | 1.249(4) | O(4)-C(8)-C(6)   | 116.1(3) |

**Table S4.** Selected bond lengths (Å) and angles (deg) for **3**.

| bond lengths (Å) |          | angles (deg)   |            |
|------------------|----------|----------------|------------|
| C(2)-C(1)        | 1.376(3) | C(1)-C(2)-C(3) | 120.0(2)   |
| C(4)-C(5)        | 1.382(3) | C(2)-C(3)-C(4) | 118.15(18) |
| C(6)-C(3)        | 1.486(3) | C(4)-C(3)-C(6) | 122.22(18) |
| C(7)-C(8)        | 1.369(3) | C(5)-C(4)-C(3) | 118.9(2)   |
| N(1)-C(1)        | 1.326(3) | N(1)-C(1)-C(2) | 120.7(2)   |
| N(1)-C(5)        | 1.334(3) | N(1)-C(5)-C(4) | 121.2(2)   |
| N(2)-C(8)        | 1.338(3) | N(2)-C(8)-C(7) | 120.53(18) |

|            |          |                  |            |
|------------|----------|------------------|------------|
| O(1)-C(16) | 1.273(3) | O(1)-C(16)-C(15) | 112.12(18) |
| O(2)-C(16) | 1.215(3) | O(2)-C(16)-C(15) | 120.96(18) |
| O(3)-C(18) | 1.289(2) | O(3)-C(18)-C(17) | 113.38(16) |
